# Supplementary material
Source: publisher figshare collection journal article supplement (https://karger.figshare.com/ndownloader/files/22689557)
Supplement: Supplementary file 1 [file 22689557]

## In Supplemental Materials

### Figure A1: Alcohol-attributable age-adjusted mortality rates per 100,000 since 2000 and 95% confidence intervals

(Source: Own calculations based on Shield et al. (23)).

### Figure A2: Alcohol-attributable age-adjusted DALYs lost rates per 100,000 since 2000 and 95% confidence intervals

(Source: Own calculations based on Shield et al. (23)).
